# Supplementary material
Source: PubMed Central journal article supplement (PMC6202204)
Supplement: NIHMS973864-supplement-Data_Supplement.pdf [file NIHMS973864-supplement-Data_Supplement.pdf]

## Data Supplement

### **Diabetes-induced lncRNA *Dnm3os* regulates macrophage functions and inflammatory genes via nuclear mechanisms**

Sadhan Das<sup>1\*</sup>, Marpadga A Reddy<sup>1\*</sup>, Parijat Senapati<sup>1</sup>, Kenneth Stapleton<sup>1</sup>, Linda Lanting<sup>1</sup>, Mei Wang<sup>1</sup>, Vishnu Amaram<sup>1</sup>, Rituparna Ganguly<sup>1</sup>, Lingxiao Zhang<sup>1</sup>, Sridevi Devaraj<sup>2</sup>, Dustin E Schones<sup>1</sup>, Rama Natarajan<sup>1</sup>

<sup>1</sup>Department of Diabetes Complications and Metabolism, Beckman Research Institute of City of Hope, Duarte, CA, United States, <sup>2</sup>Pathology and Immunology, Texas Children's Hospital, Houston, Houston, TX

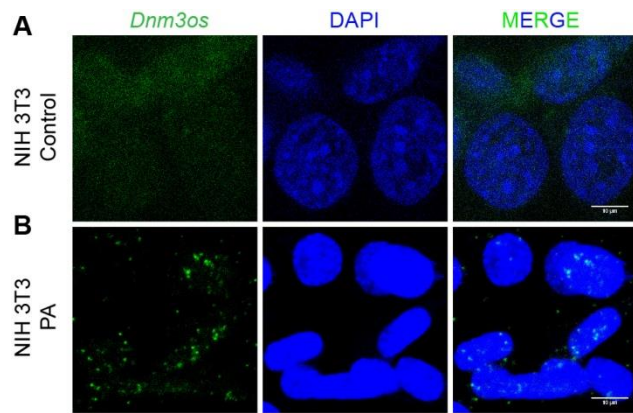

**Supplementary Figure I.** A-B. RNA fluorescence in situ hybridization (RNA-FISH) analysis of *Dnm3os* in Control (A) and PA (B) treated NIH 3T3 cells. Green dots represent single molecules of *Dnm3os* RNA in the nucleus. Blue color indicates nuclear staining by DAPI. Scale bar: 10  $\mu\text{m}$ .

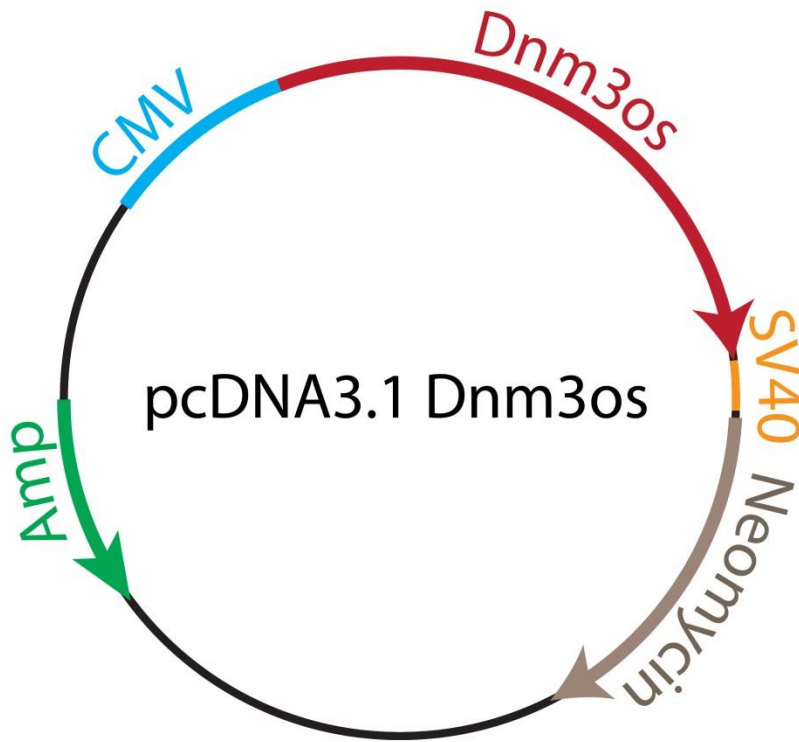

**Supplementary Figure II.** Map of *Dnm3os* expression vectors. *Dnm3os* was cloned into pcDNA3.1 (+) downstream of the CMV promoter as described in Methods section. To generate *Dnm3os* anti-sense RNA, the same PCR fragment was cloned into pcDNA3.1 (-).

### RNA-Seq Analysis Pipeline

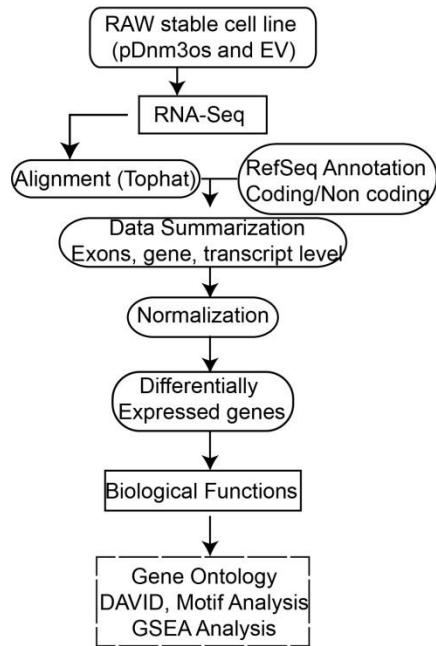

**Supplementary Figure III.** RNA-seq analysis pipeline used to analyze gene expression in RAW macrophages stably transfected with empty vector pcDNA3.1 (EV) and a vector expressing *Dnm3os* (pDnm3os).

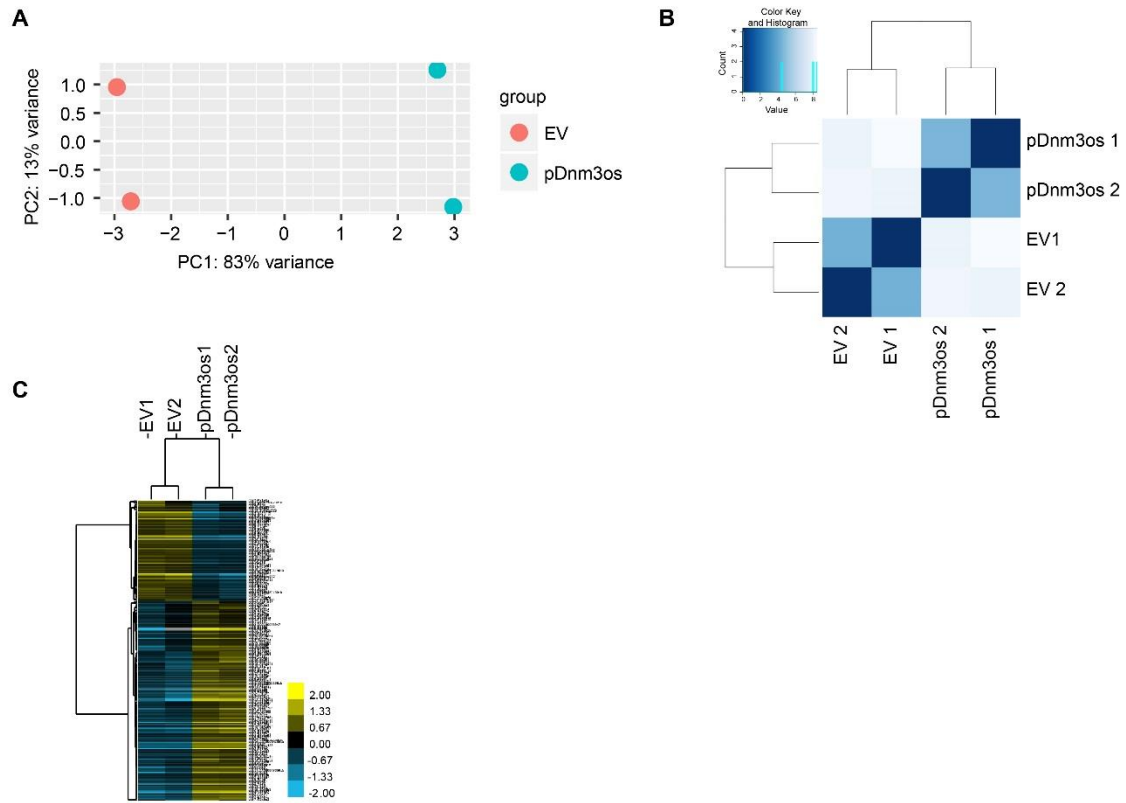

**Supplementary Figure IV.** A. Principle component analysis (PCA) plot and B. Correlation heatmap showing good replicate consistency. C. RNA-seq results depicted by heat map of differentially expressed genes from RAW macrophages stably expressing *Dnm3os* (pDnm3os) or control empty vector pcDNA3.1 (EV) (n=2).

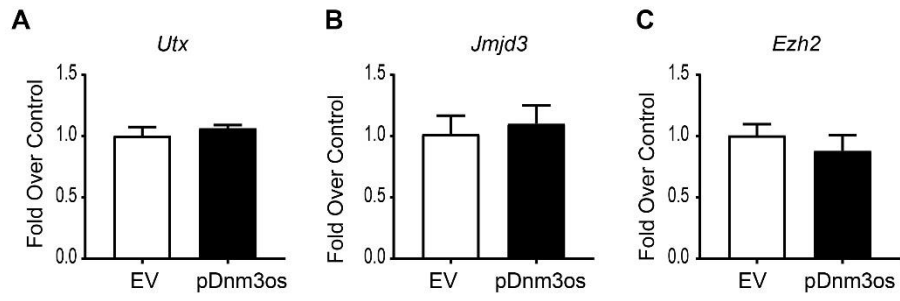

**Supplementary Figure V.** RT-qPCR analysis of additional differentially expressed genes in RAW-Dnm3os (pDnm3os) and control RAW-EV (EV) macrophages identified in RNA-seq analysis.

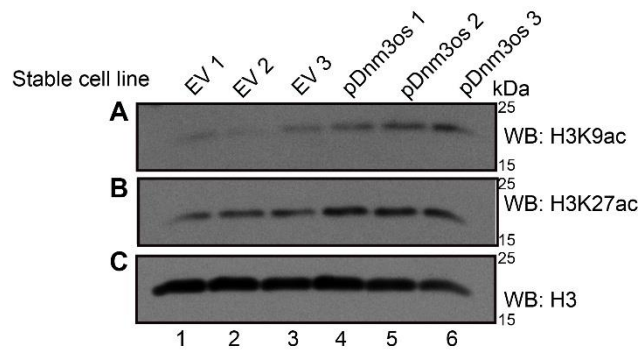

**Supplementary Figure VI.** Western blots showing levels of global histone modifications in RAW-EV (EV) and RAW-Dnm3os (pDnm3os) macrophages. Total cell lysates were immunoblotted with antibodies against histone modifications H3K9ac (A) and H3K27ac (B). Histone H3 (C) was used as a loading control.

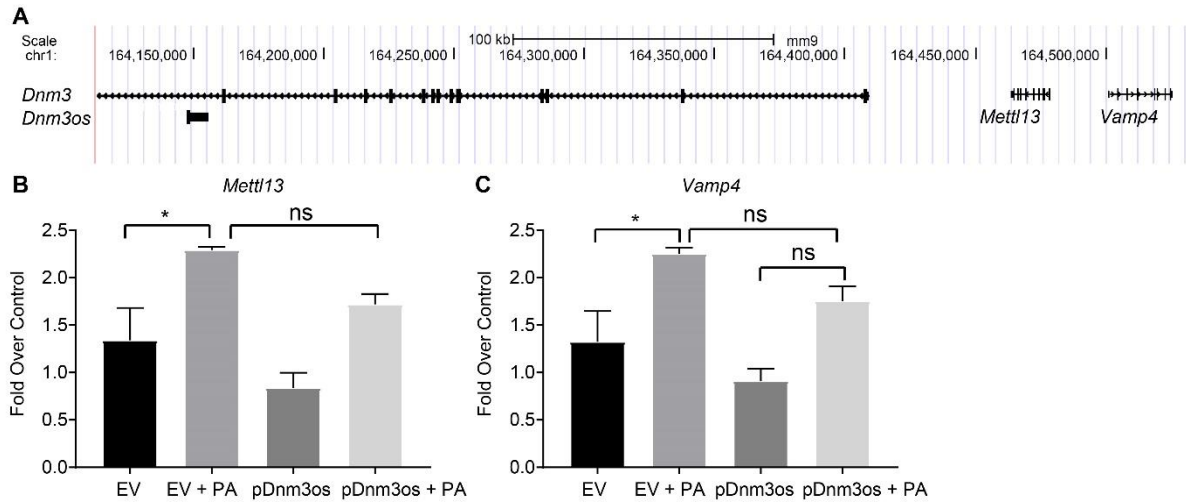

**Supplementary Figure VII.** *Dnm3os* overexpression does not affect its nearby genes *Mettl13* and *Vamp4* in PA treated cells. A. Genomic locations of *Dnm3os* nearby genes. B-C. Bar graphs showing RT-qPCR analysis of indicated genes in RAW-Dnm3os (pDnm3os) versus RAW-EV (EV) macrophages. Mean +SEM; n=3, \* $P < 0.05$ ; one way ANOVA, Tukey's multiple comparison test.



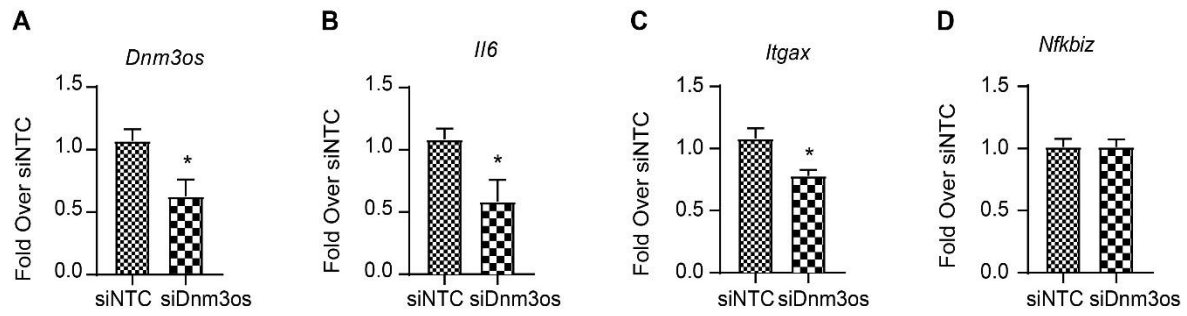

**Supplementary Figure VIII.** Gene expression in RAW macrophages transfected with siDnm3os versus non-targeting control (siNTC) oligonucleotides. Mean+SEM; n=3, \*  $P < 0.05$ , unpaired two tailed t-tests.

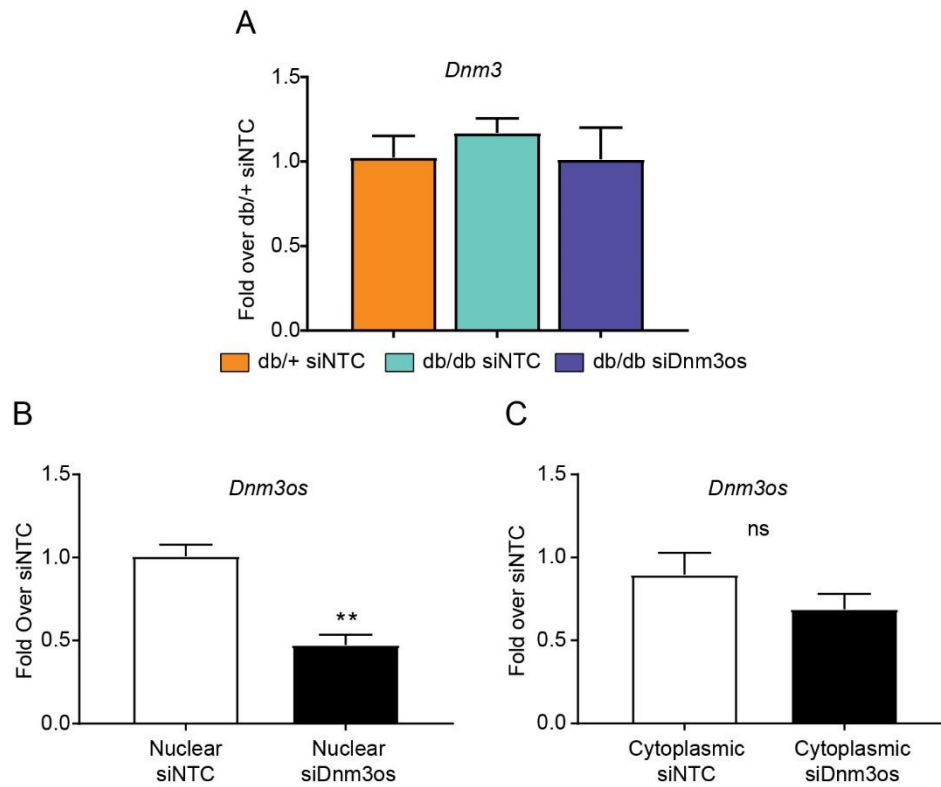

**Supplementary Figure IX. A.** *Dnm3* gene expression (RT-qPCR) in BMDMs transfected with siDnm3os versus non-targeting control (siNTC) in db/db versus db/+ mice. Mean+SEM, n=4; one way ANOVA, Tukey's multiple comparison test. **B-C.** RT-qPCR analysis of *Dnm3os* from nuclear and cytoplasmic fractions of BMDMs from db/db mice after *Dnm3os* knockdown with siRNAs. Gene expression normalized to *Ppia* is expressed as Fold over siNTC. Mean + SEM; n=3 independent experiments. \*\* $P < 0.01$ , unpaired two tailed t-tests.

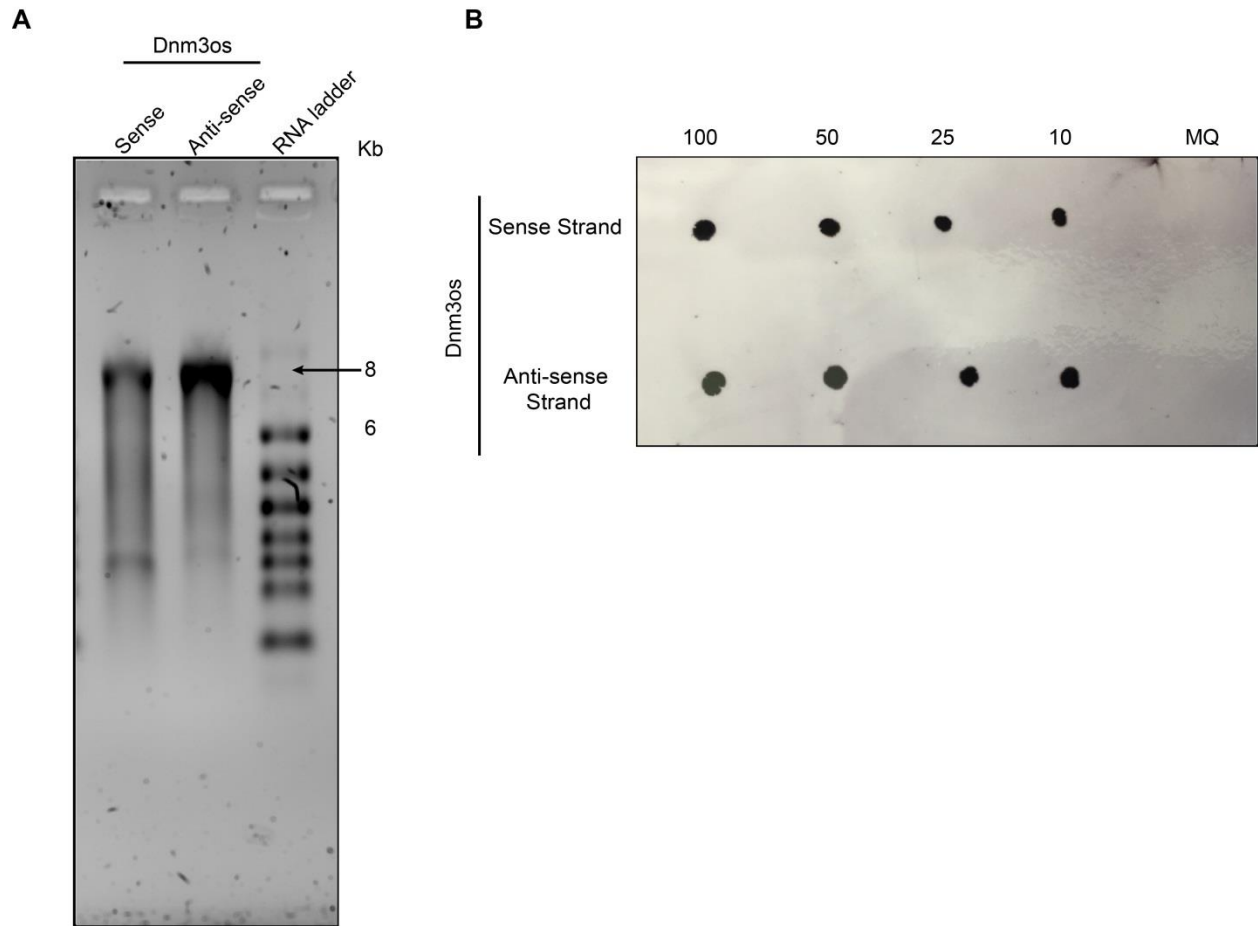

**Supplementary Figure X:** Synthesis of biotinylated *Dnm3os* RNA probes using *in vitro* transcription. **A.** Image of denaturing agarose gel showing integrity of biotinylated *Dnm3os* sense and anti-sense RNA probes synthesized by *in vitro* transcription. Arrow indicates bands of sense and anti-sense probes (8 kb). **B.** Dot blot quantification of indicated *Dnm3os* probes. Serial dilutions of indicated probes were spotted onto nitrocellulose membrane and biotinylation levels were detected with horse radish peroxidase conjugated Avidin.

A

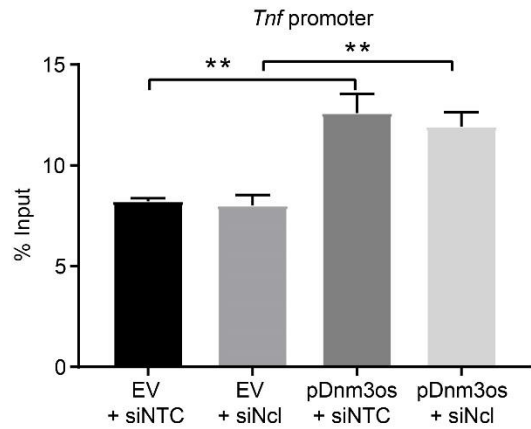

B

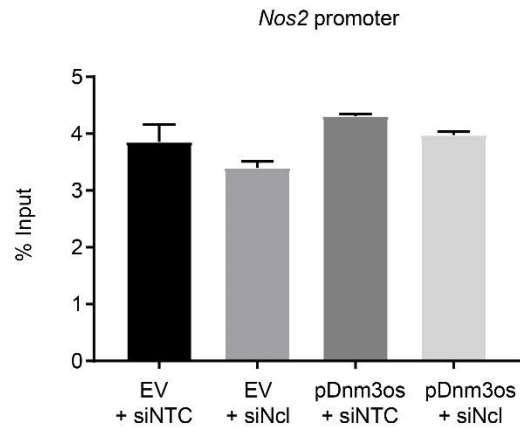

**Supplementary Figure XI: A-B.** Bar graphs represent H3K9ac enrichment on the *Tnf* (A) and *Nos2* (B) promoter (at NF- $\kappa$ B binding site) in RAW-EV and RAW-Dnm3os (pDnm3os) macrophages transfected with siNTC or siNcl. Data are shown as percent input. Mean+SEM; n=4, (\*\* $P$ <0.01) one way ANOVA, Tukey's multiple comparison tests.

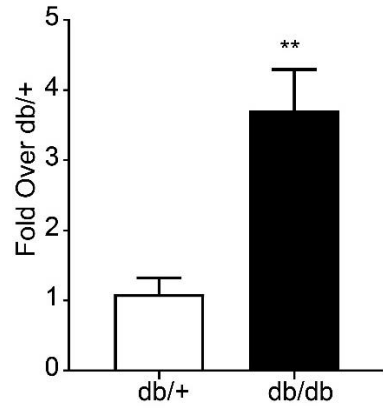

**Supplementary Figure. XII.** *Dnm3os* expression in BMDMs from female db/db mice versus control db/+ littermates. Mean+SEM; n=5-6, \*\* $P < 0.01$ , unpaired two tailed t-tests.

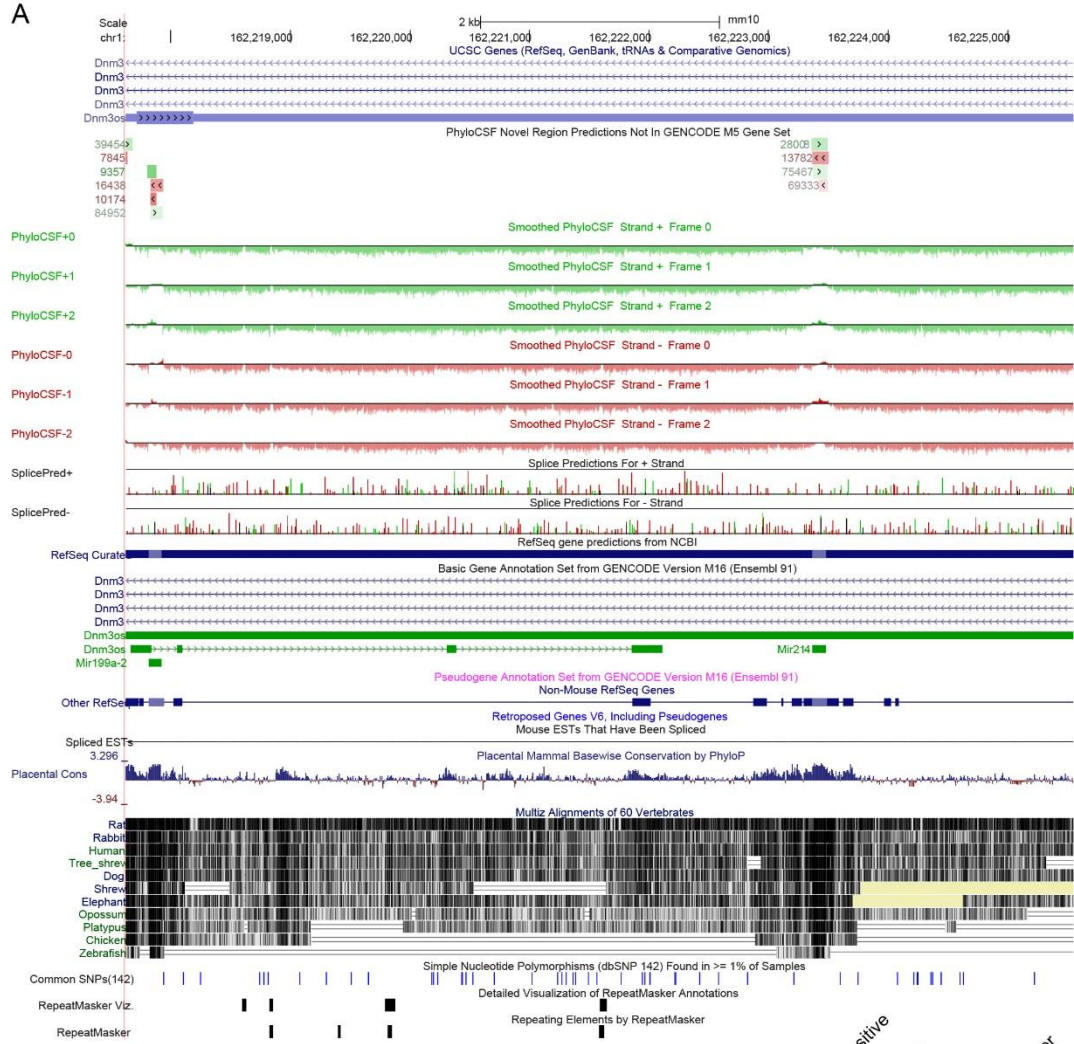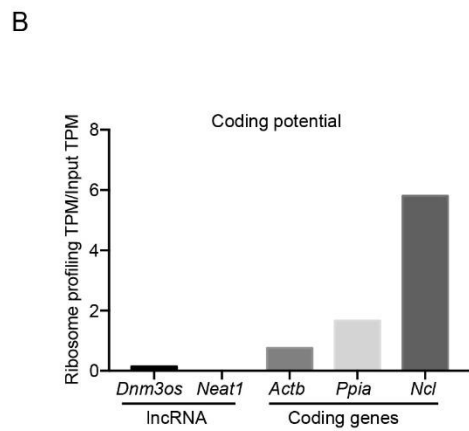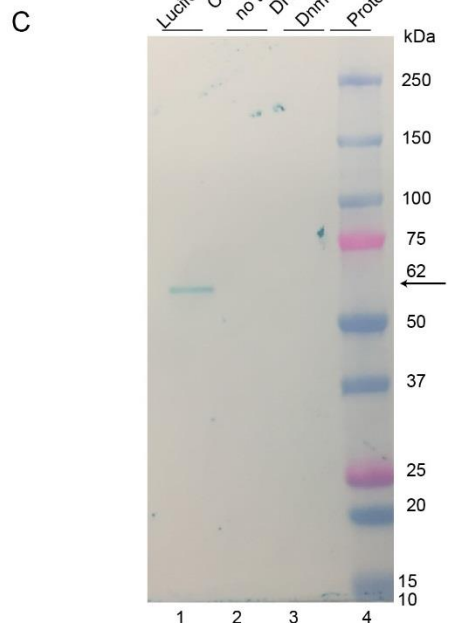

**Supplementary Figure XIII:** A. PhyloCSF tracks of the lncRNA *Dnm3os* genomic region in UCSC browser. The tracks show scores for each codon in 6 frames. A score greater than 0 indicates protein-coding. For *Dnm3os* loci, all scores were less than 0. B. Ratio of transcripts per million (TPM) values from ribosomal profiling and input-RNA profiling for indicated genes in peritoneal macrophages at basal condition. C. *In vitro* transcription/translation reactions were performed with *Dnm3os*, no template DNA and luciferase control plasmid. The luciferase positive control generated a 62 kDa protein while *Dnm3os* transcript generated no protein products.

DNM3OS Gene Expression from GTEx (Release V6 )

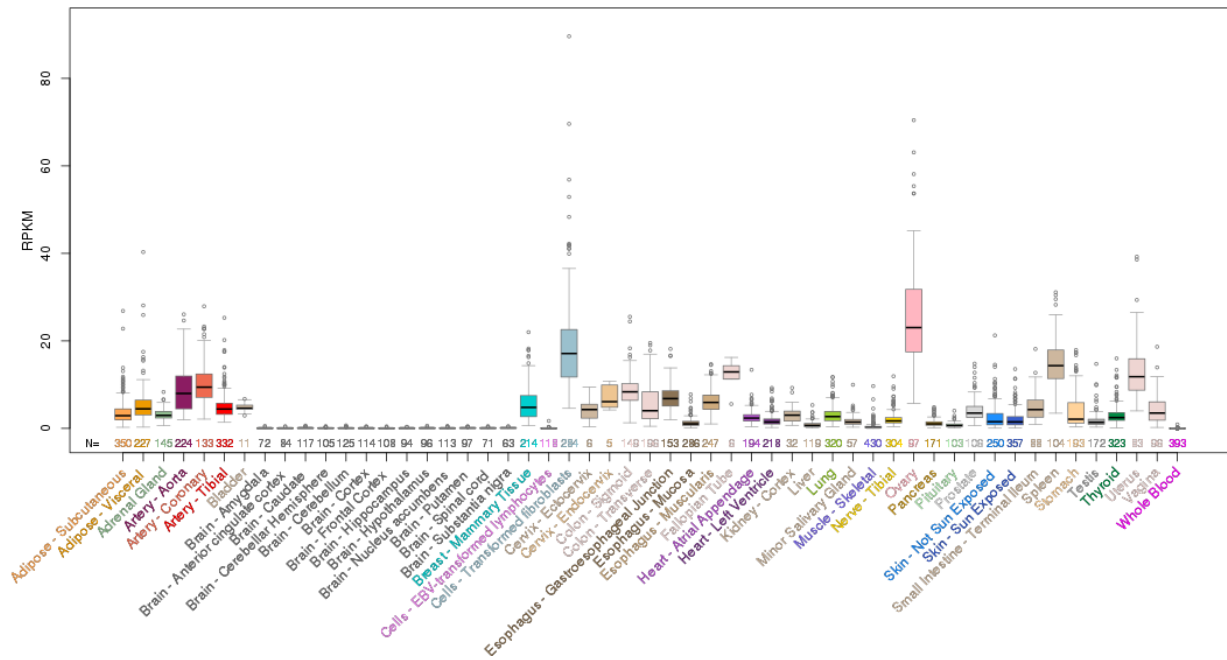

**Supplementary Figure XIV:** Graphs showing expression levels of lncRNA *Dnm3os* in various human tissues (RNA-Seq Expression Data from GTEx (<https://www.gtexportal.org/home>)).



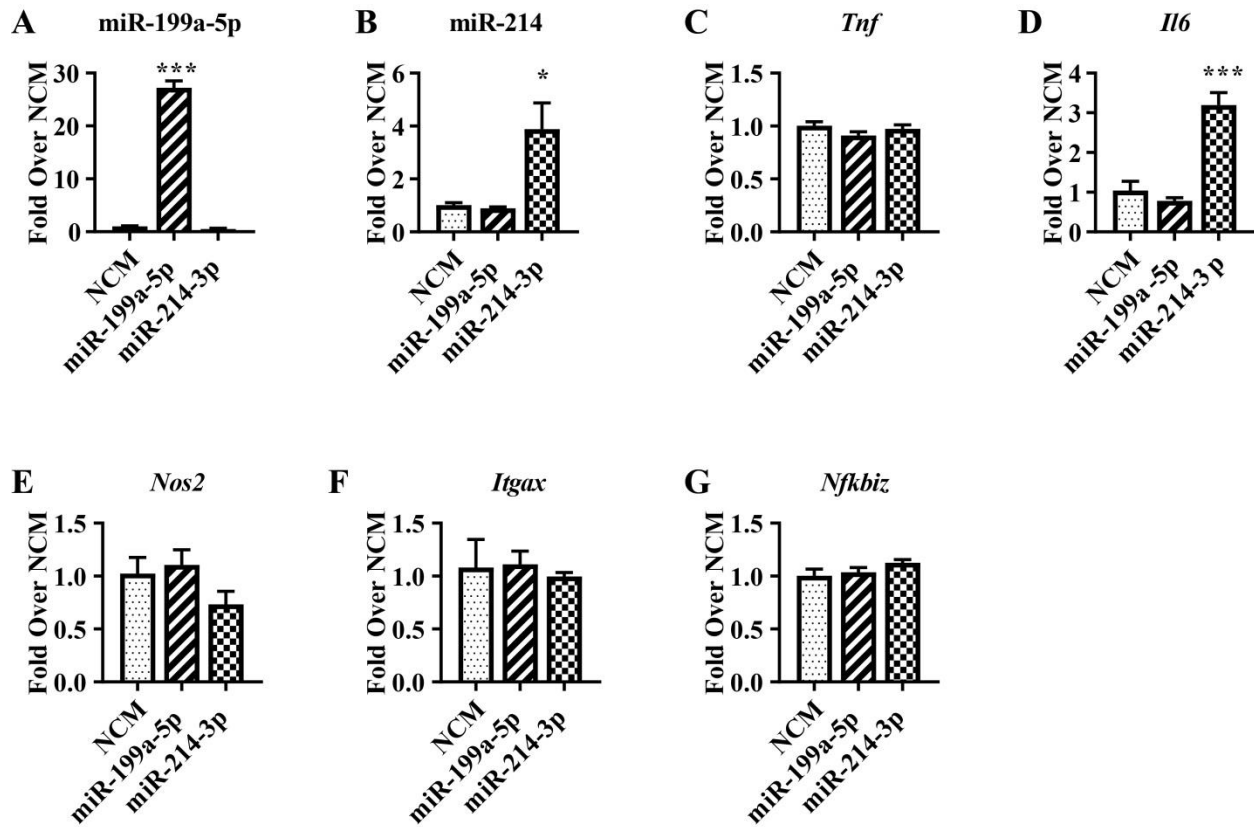

**Supplementary Figure XV: Effect of miR-199a and miR-214 overexpression on *Dnm3os* targets.** RAW macrophages were transfected with miR-199a-5p and miR-214 mimic oligonucleotides. As control, RAW cells were also transfected with Negative Control mimic (NCM) oligonucleotides. RNA was extracted at 48 hrs post transfection and expression of indicated miRNAs and *Dnm3os* target genes was analyzed by RT-qPCR. *U6* and *Rplp0* were used internal controls for miRNAs and target genes respectively. Normalized data was expressed as Fold over NCM transfected cells. Mean+SEM, n=3. \*\*\*, p<0.0006 and \*, p<0.05, ANOVA, Dunnett's multiple comparisons test.

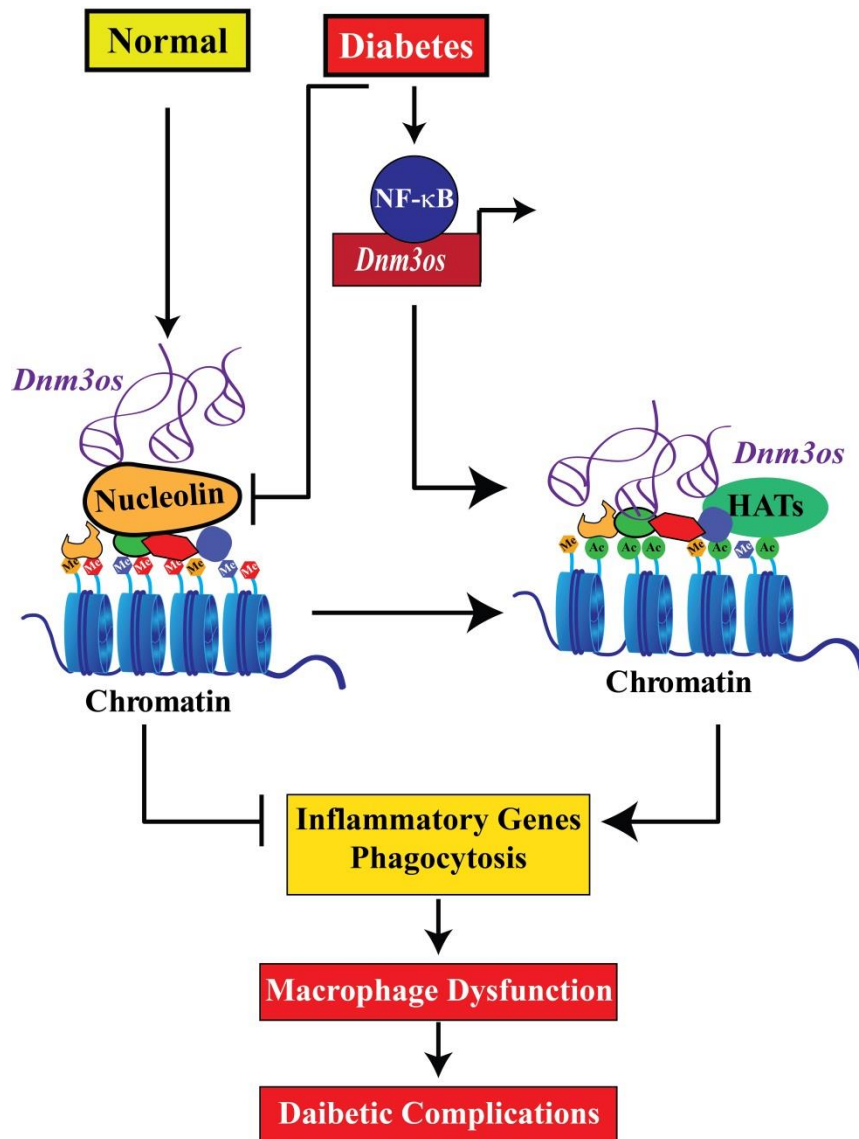

**Supplementary Figure XVI:** Schematic diagram showing mechanisms of *Dnm3os* induced inflammatory gene regulation in diabetes. Under normal conditions, nucleolin interacts with and prevents the functional ability of *Dnm3os* to increase enrichment of permissive histone modifications like H3K9ac at promoters of inflammatory genes such as *Il6*. But, under diabetic conditions, increased *Dnm3os* and reduced nucleolin levels disrupt such interactions, allowing *Dnm3os* to enhance promoter H3K9ac, likely via recruitment of histone acetyl transferases (HATs), and other unidentified epigenetic mechanisms leading to chromatin relaxation and upregulation of inflammatory genes and macrophage dysfunction associated with diabetic complications.

| Sample   | Total Reads | Aligned Reads | Exon Reads | rRNA Reads | % Aligned | % Exon | %rRNA |
|----------|-------------|---------------|------------|------------|-----------|--------|-------|
| EV1      | 35,030,107  | 32,153,451    | 27,453,044 | 238,190    | 91.8%     | 85.4%  | 0.7%  |
| EV2      | 31,152,524  | 28,548,480    | 24,481,379 | 206,047    | 91.6%     | 85.8%  | 0.7%  |
| Dnm3os 1 | 26,104,459  | 23,876,409    | 20,302,743 | 296,821    | 91.5%     | 85.0%  | 1.2%  |
| Dnm3os 2 | 30,405,409  | 27,808,541    | 23,674,005 | 255,258    | 91.5%     | 85.1%  | 0.9%  |

**Supplementary Table I:** RNA-seq data from RAW macrophages stably expressing *Dnm3os* and EV. RNA-seq run in biological replicates (1 and 2).

**Supplementary Table II. List of PCR primer sequences used in this study.**

| <b>Gene</b>              | <b>Forward Primer (5'-3')</b> | <b>Reverse Primer (5'-3')</b> |
|--------------------------|-------------------------------|-------------------------------|
| <b>Taqman assays</b>     |                               |                               |
| <i>Dnm3os</i>            | gggttagatgctatgggtgtgag       | agaacatccgctcacctgta          |
| <i>DNM3OS</i>            | cgacaaacatccaactgaagc         | acactctcgacattcactgc          |
| <b>SYBR Green Assays</b> |                               |                               |
| <i>U6</i>                | gttcttgcttcggcagaac           | aaaatgtggaacgcttcacg          |
| <i>Neat1</i>             | tggctcactcttcctactc           | ccacctttacaaaatgccg           |
| <i>Kcnq10t1</i>          | cctgaggatggctgtgtattag        | taccgtgtgccctttgttag          |
| <i>Ppia</i>              | atggcaaccccaccgtg             | ttctgctgtctttggaactttgtc      |
| <i>Ncl</i>               | tctgtttctggcttcaggg           | gaagatgacgaggatgaggatg        |
| <i>Nfkbiz</i>            | ggataaagagcctgtagacac         | aagaggcgaatgagtccag           |
| <i>Dnm3os</i>            | tttctttccccctcacgg            | cagggtaaatctgtcaggagc         |
| <i>Cd74</i>              | aagtacggcaacatgaccc           | atctccagttcacgccatc           |
| <i>Irak3</i>             | acgaaggccaagttaagacc          | aagaacagtggagaaggacac         |
| <i>C5ar1</i>             | gagggttaaaaggcacagc           | atccatggtccatagtgatcatag      |
| <i>Ptafr</i>             | ctcctacaggcatattcagcg         | tcgaaactcagaatccacacg         |
| <i>Cxcl3</i>             | tttgagaccatccagagcttg         | ttctgaccatccttgagagtg         |
| <i>Tnfrsf1b</i>          | atgttaggactgggtaactgc         | tgtggcaacaggtgctg             |
| <i>Tlr1</i>              | agaggcaattgtggacacc           | gaagatgagggaatttggtttagtc     |
| <i>Itgal</i>             | ctatgtagtgttgacctggacc        | cctgtagctctgagaccatttc        |
| <i>Cxcl2</i>             | tgctcacctaaagaacctc           | ctgaagttaacctgtatftccctg      |
| <i>Itgax</i>             | ttcaaggagacaaagaccgg          | agagaaaagttgaggcgaagag        |
| <i>Il6</i>               | ctctgaaggactctgctttg          | gatgctacaaactggatataatcag     |
| <i>Tnf</i>               | tgttgccctcttttgcct            | tggtcaccaaatacagcgta          |
| <i>Nos2</i>              | cctggagacccacacactgg          | cacagccacattgatctccg          |
| <i>Cd36</i>              | gatgacgtggcaagaacag           | tcctcggggtcctgagttat          |
| <i>Ptgs2</i>             | gagcaactattccaaccagca         | cggtttgagttgaagtggtaaccg      |
| <i>Utx</i>               | atcccagctcagcagaagt           | ggaggaagaagcatcacg            |
| <i>Jmjd3</i>             | ccccatttcagctgactaa           | ctggaccaaggggtgtgtt           |
| <i>Ezh2</i>              | ctaattggacttactacgataactt     | actctaaactatacactgtctacat     |
| <i>Mettl13</i>           | gcactcggcagtgacttaata         | ggaatagtggcttcgctcagtag       |
| <i>Vamp4</i>             | gagggtgtggactgaaatag          | aggtgtccggcagctataa           |
| <i>IL6</i>               | caacctgaacctccaagatg          | acctcaactccaaaagaccag         |
| <i>TNF</i>               | ccctgaaacaacctcaga            | gtcctttccaggggagagag          |
| <i>NOS2</i>              | tgccaaactgaattgaatgag         | cttcgcctcgttaaggaataca        |
| <i>HPRT1</i>             | agatggcaaggtcgaag             | acagagggtacaatgtgatg          |
| <i>NFKBIZ</i>            | aattagatgctgcccgcctg          | ctttccctcaggatagctcg          |

|                            |                              |                                      |
|----------------------------|------------------------------|--------------------------------------|
| <i>ITGAX</i>               | gtccacatctgaccttag           | accacgtgtctccaaac                    |
| <i>Dnm3</i>                | gcctgtcctggtataaagacg        | cattcctttgctcgggttg                  |
| <b>ChIP Primers</b>        |                              |                                      |
| <i>Il6</i> promoter        | cgttfatgattctttc gatgctaaacg | gtgggctccagagcagaatgag               |
| <i>Tnf</i> promoter        | ccaggattctgtggcaatct         | gtttcagttctcagggcctatac              |
| <i>Nos2</i> promoter       | cacagactaggagtgccatca        | gcagcagccatcaggtatt                  |
| <i>Dnm3os</i> promoter     | aaaggaggaggaggaggag          | ccttagtgaggtcagataagtgg              |
| <b>Cloning primers</b>     |                              |                                      |
| <i>Dnm3os</i> WT Promoter  | cgagctcgggccagttcaacagattac  | ccgctcgagttgtcctgaacaggtagtctgaac    |
| <i>Dnm3os</i> Mut Promoter | cgagctcaacttatctgacctactaagg | ccgctcgagttgtcctgaacaggtagtctgaac    |
| <i>Dnm3os</i> (FL cloning) | cgggatccttttctggtcctaaattc   | aaggaaaaageggccgttcatacttgaattttattc |
