# Supplementary material
Source: PubMed Central journal article supplement (PMC6202204)

Graphic Abstract

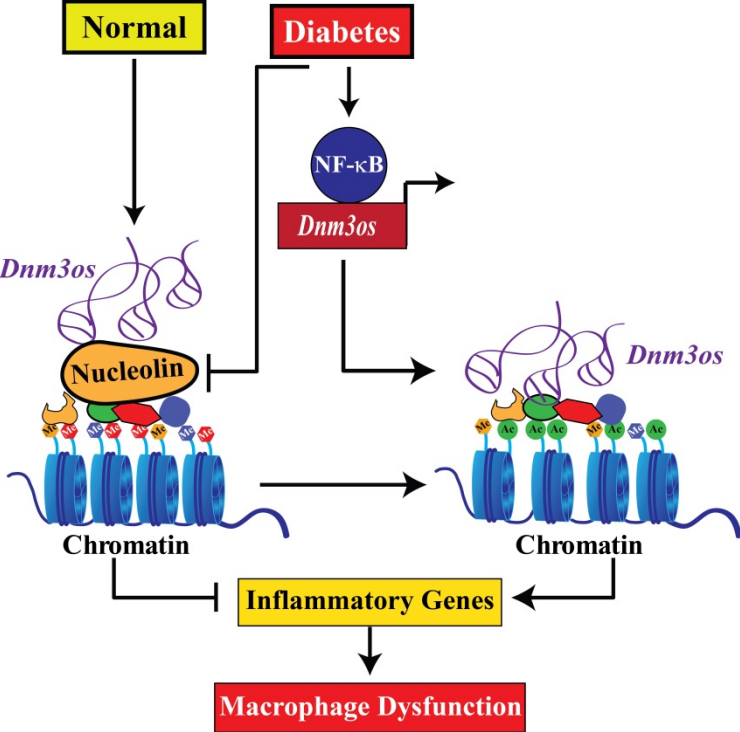

Supplement: NIHMS973864-supplement-Graphic_abstract.pdf [file NIHMS973864-supplement-Graphic_abstract.pdf]
